# Supplementary material for: Efficacy and Safety of Hylan G-F 20 Versus Intra-Articular Corticosteroids in People with Knee Osteoarthritis: A Systematic Review and Network Meta-Analysis
Source: PubMed Central journal article supplement — Clin Med Insights Arthritis Musculoskelet Disord. 2020 Nov 23;13:1179544120967370. doi: 10.1177/1179544120967370 (PMC7691947; doi:10.1177/1179544120967370), 2020-11-23
Supplement: sj-pdf-1-amd-10.1177_1179544120967370.pdf [file sj-pdf-1-amd-10.1177_1179544120967370.pdf]

**Supplementary Table 1:** Search strategy for Medline (via PubMed) from inception to June 12, 2018.

| #  | Term                                                                                                                                                                                                                                                                                                                                                                                                                                                                                                                                                                                                   | Hits    |
|----|--------------------------------------------------------------------------------------------------------------------------------------------------------------------------------------------------------------------------------------------------------------------------------------------------------------------------------------------------------------------------------------------------------------------------------------------------------------------------------------------------------------------------------------------------------------------------------------------------------|---------|
| 1  | "Osteoarthritis, Knee"[MeSH]                                                                                                                                                                                                                                                                                                                                                                                                                                                                                                                                                                           | 16136   |
| 2  | "Osteoarthritis"[mesh] OR osteoarthriti*[tiab] OR osteo-arthriti*[tiab] OR osteoarthro*[tiab] OR osteo-arthro*[tiab] OR degenerative arthr*[tiab] OR "degenerative joint"[tiab] OR gonarthriti*[tiab] OR gonarthro*[tiab] OR osteoarthrosis deformans[tiab]                                                                                                                                                                                                                                                                                                                                            | 83292   |
| 3  | "Knee Joint"[mesh] OR knee*[tiab] OR "Patella"[mesh] OR patella*[tiab] OR tibio-femoral[tiab] OR patellofemoral[tiab]                                                                                                                                                                                                                                                                                                                                                                                                                                                                                  | 149389  |
| 4  | 2 AND 3                                                                                                                                                                                                                                                                                                                                                                                                                                                                                                                                                                                                | 31151   |
| 5  | 1 OR 4                                                                                                                                                                                                                                                                                                                                                                                                                                                                                                                                                                                                 | 32440   |
| 6  | (Steroids[mh] OR adrenal cortex hormones [pharmacological action] OR steroid*[tiab] OR Corticosteroid*[tiab] OR Cortico-steroid*[tiab] OR Corticoid*[tiab] OR Corti-coid*[tiab] OR glucocorticoid*[tiab] OR Triamcinolone OR Aristocort OR Volon OR Cinonide OR Tricort* OR Kena log OR Azmacort OR Aristospan OR Tricort OR Triaderm OR Trilone OR Tristoject OR Tricortone OR Ratio-Triacomb OR Trianex OR Betamethasone OR Celestone OR Betnesol OR Dexamethasone OR Decadron OR Methylprednisolone OR Medrol OR Urbason OR Meprolone OR A-Methapred OR Depo-Medrol OR Solu-Medrol OR Depo-Medrone) | 1050152 |
| 7  | Synvisc*[tiab] OR Synvisc One[tiab] OR SynviscOne[tiab] OR hylan*[tiab] OR Hylan GF20[tiab] OR Hylan GF 20[tiab] OR Hylan G F 20[tiab] OR Hylan G-F 20[tiab]                                                                                                                                                                                                                                                                                                                                                                                                                                           | 482     |
| 8  | 6 or 7                                                                                                                                                                                                                                                                                                                                                                                                                                                                                                                                                                                                 | 1050581 |
| 9  | 5 and 8                                                                                                                                                                                                                                                                                                                                                                                                                                                                                                                                                                                                | 1475    |
| 10 | ((((randomized controlled trial[pt] OR controlled clinical trial[pt] OR randomized[tiab] OR randomised[tiab] OR placebo[tiab] OR clinical trials as topic[mesh: noexp] OR randomly[tiab] OR trial[ti]) OR ((RCT[tiab] OR placebo[tiab] OR sham[tiab] OR dummy[tiab] OR single blind*[tiab] OR double blind*[tiab] OR allocated[tiab] OR allocation[tiab] OR triple blind*[tiab] OR treble blind*[tiab] OR random*[tiab])) NOT medline[sb])) NOT (animals [mh] NOT humans [mh]))                                                                                                                        | 1156678 |
| 11 | 9 and 10                                                                                                                                                                                                                                                                                                                                                                                                                                                                                                                                                                                               | 496     |
| 12 | 11 and eng[la]                                                                                                                                                                                                                                                                                                                                                                                                                                                                                                                                                                                         | 452     |

**Supplementary Table 2:** Search strategy for Embase (via Ovid) from inception to June 12, 2018.

| #  | Searches                                                                                                                                                                                                                                                                                                                                                                                                                                                                                                                                                                                                                                                                           | Hits    |
|----|------------------------------------------------------------------------------------------------------------------------------------------------------------------------------------------------------------------------------------------------------------------------------------------------------------------------------------------------------------------------------------------------------------------------------------------------------------------------------------------------------------------------------------------------------------------------------------------------------------------------------------------------------------------------------------|---------|
| 1  | *osteoarthritis/ or (degenerative arthr\$ or osteoarthr\$ or osteo-arthr\$ or OA or osteoarthrosis deformans).ti,ab.                                                                                                                                                                                                                                                                                                                                                                                                                                                                                                                                                               | 114492  |
| 2  | *patella/ or *knee/ or (knee or knees or patella\$ or tibio-femoral or patellofemoral).ti,ab.                                                                                                                                                                                                                                                                                                                                                                                                                                                                                                                                                                                      | 178601  |
| 3  | *knee osteoarthritis/                                                                                                                                                                                                                                                                                                                                                                                                                                                                                                                                                                                                                                                              | 17748   |
| 4  | (1 and 2) or 3                                                                                                                                                                                                                                                                                                                                                                                                                                                                                                                                                                                                                                                                     | 41674   |
| 5  | *triamcinolone/ or *betamethasone/ or *methylprednisolone/ or *dexamethasone/ or *triamcinolone hexacetonide/ or *triamcinolone acetonide/ or *methylprednisolone acetate/ or (steroid* or Corticosteroid* or Cortico-steroid* or Corticoid* or Corti-coid* or glucocorticoid* or Triamcinolone or Aristocort or Volon or Cinonide or Tricort* or Kenalog or Azmacort or Aristospan or Tricort or Triaderm or Trilone or Tristoject or Tricortone or Ratio-Triacomb or Trianex or Betamethasone or Celestone or Betnesol or Dexamethasone or Decadron or Methylprednisolone or Medrol or Urbason or Mepralone or A-Methapred or Depo-Medrol or Solu-Medrol or Depo-Medrone).ti,ab. | 561922  |
| 6  | (Synvisc* or Synvisc One or SynviscOne or hylan\$ or Hylan GF20 or Hylan GF 20 or Hylan G F 20 or Hylan G-F 20).ti,ab,tn.                                                                                                                                                                                                                                                                                                                                                                                                                                                                                                                                                          | 1011    |
| 7  | 5 or 6                                                                                                                                                                                                                                                                                                                                                                                                                                                                                                                                                                                                                                                                             | 562809  |
| 8  | 4 and 7                                                                                                                                                                                                                                                                                                                                                                                                                                                                                                                                                                                                                                                                            | 2029    |
| 9  | 8 not ((exp animal/ or nonhuman/) not exp human/)                                                                                                                                                                                                                                                                                                                                                                                                                                                                                                                                                                                                                                  | 1902    |
| 10 | limit 9 to english language                                                                                                                                                                                                                                                                                                                                                                                                                                                                                                                                                                                                                                                        | 1692    |
| 11 | limit 10 to (article or article in press or conference paper)                                                                                                                                                                                                                                                                                                                                                                                                                                                                                                                                                                                                                      | 774     |
| 12 | limit 10 to (yr="2016 - 2018" and (conference abstract or "conference review"))                                                                                                                                                                                                                                                                                                                                                                                                                                                                                                                                                                                                    | 208     |
| 13 | randomized controlled trial/ or *"randomized controlled trial (topic)"/ or exp randomization/ or Single blind procedure/ or Double blind procedure/ or Triple blind procedure/ or Crossover procedure/ or Placebo/                                                                                                                                                                                                                                                                                                                                                                                                                                                                 | 852039  |
| 14 | (RCT or placebo or sham or dummy or single blind\$ or double blind\$ or allocated or allocation or triple blind\$ or treble blind\$ or random\$).ti,ab,kw.                                                                                                                                                                                                                                                                                                                                                                                                                                                                                                                         | 1584582 |
| 15 | 13 or 14                                                                                                                                                                                                                                                                                                                                                                                                                                                                                                                                                                                                                                                                           | 1825404 |
| 16 | 15 not ((exp animal/ or nonhuman/) not exp human/)                                                                                                                                                                                                                                                                                                                                                                                                                                                                                                                                                                                                                                 | 1555862 |
| 17 | 11 or 12                                                                                                                                                                                                                                                                                                                                                                                                                                                                                                                                                                                                                                                                           | 982     |
| 18 | 16 and 17                                                                                                                                                                                                                                                                                                                                                                                                                                                                                                                                                                                                                                                                          | 431     |
| 19 | remove duplicates from 18                                                                                                                                                                                                                                                                                                                                                                                                                                                                                                                                                                                                                                                          | 418     |

**Supplementary Table 3:** Search strategy for Cochrane Central Register of Controlled Trials (CENTRAL) (via Ovid) from inception to June 12, 2018.

| #  | Searches                                                                                                                                                                                                                                                                                                                                                                                                                                                                                               | Hits  |
|----|--------------------------------------------------------------------------------------------------------------------------------------------------------------------------------------------------------------------------------------------------------------------------------------------------------------------------------------------------------------------------------------------------------------------------------------------------------------------------------------------------------|-------|
| 1  | [mh "Osteoarthritis, Knee"]                                                                                                                                                                                                                                                                                                                                                                                                                                                                            | 3423  |
| 2  | [mh Osteoarthritis] or (osteoarthriti* or osteo-arthriti* or osteoarthro* or osteo-arthro* or degenerative arthr* or "degenerative joint" or gonarthriti* or gonarthro*):ti,ab,kw                                                                                                                                                                                                                                                                                                                      | 12473 |
| 3  | [mh "Knee Joint"] or [mh Patella] or (knee* or patella* or tibio-femoral or patellofemoral):ti,ab,kw                                                                                                                                                                                                                                                                                                                                                                                                   | 20946 |
| 4  | #2 and #3                                                                                                                                                                                                                                                                                                                                                                                                                                                                                              | 7902  |
| 5  | #1 or #4                                                                                                                                                                                                                                                                                                                                                                                                                                                                                               | 7902  |
| 6  | (steroid* or Corticosteroid* or Cortico-steroid* or Corticoid* or Corti-coid* or glucocorticoid* or Triamcinolone or Aristocort or Volon or Cinonide or Tricort* or Kenalog or Azmacort or Aristospan or Tricort or Triaderm or Trilone or Tristoject or Tricortone or Ratio-Triacomb or Trianex or Betamethasone or Celestone or Betnesol or Dexamethasone or Decadron or Methylprednisolone or Medrol or Urbason or Mepralone or A-Methapred or Depo-Medrol or Solu-Medrol or Depo-Medrone):ti,ab,kw | 52130 |
| 7  | [mh Steroids]                                                                                                                                                                                                                                                                                                                                                                                                                                                                                          | 51851 |
| 8  | (Synvisc* or Synvisc One or SynviscOne or Hylan* or Hylan GF20 or Hylan GF 20 or Hylan G F 20 or Hylan G-F 20):ti,ab,kw                                                                                                                                                                                                                                                                                                                                                                                | 146   |
| 9  | #6 or #7 or #8                                                                                                                                                                                                                                                                                                                                                                                                                                                                                         | 88181 |
| 10 | #5 and #9                                                                                                                                                                                                                                                                                                                                                                                                                                                                                              | 1011  |
| 11 | #10 not (pubmed or embase):an                                                                                                                                                                                                                                                                                                                                                                                                                                                                          | 197   |
| 12 | #11 not clinicaltrials.gov:so in Trials                                                                                                                                                                                                                                                                                                                                                                                                                                                                | 24    |

**Supplementary Table 4:** League table for change from baseline to 6 months in pain scores.

| Fixed Effects - Relative Standardized Mean Difference (95% CrI) |                     |                    |                      |
|-----------------------------------------------------------------|---------------------|--------------------|----------------------|
| <b>PBO</b>                                                      | 0.29 (0.15, 0.43)   | 0.36 (0.22, 0.49)  | 0.16 (0.05, 0.26)    |
| -0.29 (-0.43, -0.15)                                            | <b>Hylan G-F 20</b> | 0.06 (-0.03, 0.16) | -0.13 (-0.25, -0.01) |
| -0.36 (-0.49, -0.22)                                            | -0.06 (-0.16, 0.03) | <b>HA</b>          | -0.20 (-0.30, -0.09) |
| -0.16 (-0.26, -0.05)                                            | 0.13 (0.01, 0.25)   | 0.20 (0.09, 0.30)  | <b>CS</b>            |

Note: Each cell represents the comparison (Relative Standardized Mean Difference (95% CrI)) of the row treatment (Intervention) versus the column treatment (Comparator).
